# Supplementary material for: Understanding the structure and hydrogen bonding network of (H2O)32and (H2O)33: an improved Monte Carlo temperature basin paving (MCTBP) method and quantum theory of atoms in molecules (QTAIM) analysis
Source: Royal Society of Chemistry journal article supplement (doi:10.1039/c6ra28688g), 2017-01-01
Supplement: c6ra28688g1.pdf [file c6ra28688g1.pdf]

Figure S1: Population of energy bins of  $(\text{H}_2\text{O})_{32}$  in the original MCTBP method. The X-axis defines energy bins and Y-axis represents the frequency of the structures.



Figure S2: Variation in energy and effective temperature in the original MCTBP method for  $(\text{H}_2\text{O})_{33}$  with occasional lowering of effective temperature.



Figure S3. Graphical representation of undirected and directed graph of  $(\text{H}_2\text{O})_4$ .



Figure S4. The decomposition analysis of polarized charges on oxygen atom into the contribution of each surrounded molecule by adapting the CDRK approach for the most stable structure. (a) w15 in structure 1 for  $(\text{H}_2\text{O})_{32}$  and (b) w6 in structure 11 for  $(\text{H}_2\text{O})_{33}$  molecules were analyzed (see Figure 6). Absolute values of  $\Delta Q$  by surrounded water molecules on oxygen atom were shown. The water molecule belonging to the first, second and third solvation shells were indicated by blue, red, and black colors, respectively.

(a)



(b)



Table ST1. Total energies by the quantum mechanical calculation  $E_{QM}$ , sum of atomic energies by QTAIM method  $E_{QTAIM}$ , and their difference  $DE$  for  $(H_2O)_{32}$  clusters. The wave functions are constructed using M06-2x/6-311G(d,p) and M06-2x/6-311+G(d,p) level of theory. The structure numbers with reference to figure number 4 are also given.

| Structure No.   | M062x / 6-311G(d,p) Level |                  |                       | M062x / 6-311+G(d,p) Level |                  |                       |
|-----------------|---------------------------|------------------|-----------------------|----------------------------|------------------|-----------------------|
|                 | EQM (hartree)             | EQTAIM (hartree) | $\Delta E$ (kcal/mol) | EQM (hartree)              | EQTAIM (hartree) | $\Delta E$ (kcal/mol) |
| 1. (6(a))       | -2445.94906               | -2445.94880      | -0.16                 | -2446.06671                | -2446.06700      | 0.18                  |
| 2. (6(b))       | -2445.93454               | -2445.93562      | 0.67                  | -2446.05758                | -2446.05718      | -0.25                 |
| 3. (6(c))       | -2445.93676               | -2445.93660      | -0.10                 | -2446.05899                | -2446.05946      | 0.29                  |
| 4.              | -2445.94407               | -2445.94356      | -0.31                 | -2446.06258                | -2446.06218      | -0.25                 |
| 5.              | -2445.93643               | -2445.93607      | -0.23                 | -2446.05857                | -2446.05826      | -0.19                 |
| 6.              | -2445.93246               | -2445.93207      | -0.25                 | -2446.05625                | -2446.05591      | -0.21                 |
| 7.              | -2445.93175               | -2445.93132      | -0.27                 | -2446.05539                | -2446.05516      | -0.15                 |
| 8.              | -2445.93304               | -2445.93288      | -0.10                 | -2446.05677                | -2446.05641      | -0.23                 |
| 9.              | -2445.93043               | -2445.93018      | -0.16                 | -2446.05482                | -2446.05477      | -0.03                 |
| 10.             | -2445.93280               | -2445.93240      | -0.25                 | -2446.05621                | -2446.05589      | -0.20                 |
| 11. Structure T | -2445.94856               | -2445.94815      | -0.26                 | -2446.06659                | -2446.06625      | -0.22                 |
| 12. Structure H | -2445.94409               | -2445.94478      | 0.43                  | -2446.06208                | -2446.06198      | -0.07                 |

$${}^a\Delta E = E_{QM} - E_{QTAIM}$$

Table ST2. Total energies by the quantum mechanical calculation  $E_{QM}$ , sum of atomic energies by QTAIM method  $E_{QTAIM}$ , and their difference  $DE$  for  $(H_2O)_{33}$  clusters. The wave functions are constructed using M06-2x/6-311G(d,p) and M06-2x/6-311+G(d,p) level of theory. The structure numbers with reference to figure number 5 are also given.

| Structure         | M062x / 6-311G(d,p) Level |                  |                       | M062x / 6-311+G(d,p) Level |                  |                       |
|-------------------|---------------------------|------------------|-----------------------|----------------------------|------------------|-----------------------|
|                   | EQM (hartree)             | EQTAIM (hartree) | $\Delta E$ (kcal/mol) | EQM (hartree)              | EQTAIM (hartree) | $\Delta E$ (kcal/mol) |
| 1. (7(a))         | -2522.37349               | -2522.37306      | -0.27                 | -2522.49901                | -2522.49864      | -0.23                 |
| 2. (7(b))         | -2522.37023               | -2522.37134      | 0.70                  | -2522.49682                | -2522.49647      | -0.22                 |
| 3. (7(c))         | -2522.37006               | -2522.36967      | -0.25                 | -2522.49692                | -2522.49666      | -0.16                 |
| 4. (7(d))         | -2522.37842               | -2522.37947      | 0.66                  | -2522.50090                | -2522.50118      | 0.17                  |
| 5. (7(e))         | -2522.37137               | -2522.37076      | -0.39                 | -2522.49645                | -2522.49580      | -0.41                 |
| 6.                | -2522.36144               | -2522.36136      | -0.05                 | -2522.49165                | -2522.49137      | -0.18                 |
| 7.                | -2522.36828               | -2522.36797      | -0.19                 | -2522.49508                | -2522.49485      | -0.14                 |
| 8.                | -2522.37307               | -2522.37272      | -0.22                 | -2522.49698                | -2522.49657      | -0.26                 |
| 9.                | -2522.36827               | -2522.37095      | 1.68                  | -2522.49495                | -2522.49491      | -0.02                 |
| 10.               | -2522.36686               | -2522.36820      | 0.84                  | -2522.49353                | -2522.49353      | 0.00                  |
| 11. Structure T33 | -2522.38608               | -2522.38685      | 0.49                  | -2522.50452                | -2522.50550      | 0.61                  |
| 12. Structure H33 | -2522.37749               | -2522.37889      | 0.88                  | -2522.49951                | -2522.50074      | 0.77                  |

$${}^a\Delta E = E_{QM} - E_{QTAIM}$$

Table ST3. Hydrogen bond network of the lowest energy structures of  $(\text{H}_2\text{O})_{32}$ .  $N_{\text{HB}}$  represents number of different HB networks (directed graph) for each structure.

| <b>Structure</b>  | <b><math>N_{\text{HB}}</math></b> |
|-------------------|-----------------------------------|
| 1 <sup>a</sup> .  | 7                                 |
| 2 <sup>b</sup> .  | 193                               |
| 3 <sup>c</sup> .  | 66                                |
| 4.                | 14                                |
| 5.                | 12                                |
| 6.                | 57                                |
| 7.                | 43                                |
| 8.                | 20                                |
| 9.                | 10                                |
| 10.               | 7                                 |
| 11 <sup>d</sup> . | 2                                 |
| 12 <sup>e</sup> . | 7                                 |

- a) This structure is depicted in Figure 6(a).
- b) This structure is depicted in Figure 6(b).
- c) This structure is depicted in Figure 6(c).
- d) This is T structure.
- e) This is H structure.

Table ST4. Hydrogen bond network of lowest energy unique oxygen frames of  $(\text{H}_2\text{O})_{33}$ . The structure numbers with reference to figure number 4 are also given.  $N_{\text{HB}}$  represents number of different HB networks (directed graph) for each structure.

| Structure         | $N_{\text{HB}}$ |
|-------------------|-----------------|
| 1 <sup>a</sup> .  | 12              |
| 2 <sup>b</sup> .  | 6               |
| 3 <sup>c</sup> .  | 4               |
| 4 <sup>d</sup> .  | 11              |
| 5 <sup>e</sup> .  | 2               |
| 6.                | 24              |
| 7.                | 13              |
| 8.                | 16              |
| 9.                | 3               |
| 10.               | 6               |
| 11 <sup>f</sup> . | 8               |
| 12 <sup>g</sup> . | 1               |

- a) This structure is depicted in Figure 7(a).  
 b) This structure is depicted in Figure 7(b).  
 c) This structure is depicted in Figure 7(c).  
 d) This structure is depicted in Figure 7(d).  
 e) This structure is depicted in Figure 7(e).  
 f) This is T33 structure.  
 g) This is H33 structure.

The coordinates of the three structures in figure 6 and coordinates of 5 structures in figure 7 are given below.

Coordinate Figure 6(a)

96

Energy -317.459209670007

|   |               |               |               |
|---|---------------|---------------|---------------|
| O | -3.8048469977 | 2.7056331788  | 0.8952304031  |
| H | -4.0767909600 | 3.5519277945  | 1.2125793575  |
| H | -3.8614327997 | 2.1108840212  | 1.6259491867  |
| O | -1.0735695713 | 2.2161502117  | 0.0457972539  |
| H | -1.9711071067 | 2.3509977659  | 0.3048743923  |
| H | -0.8386407067 | 1.3455152206  | 0.3245114353  |
| O | -3.3647061124 | -1.0103209490 | 0.3459640368  |
| H | -4.1723135655 | -1.1130259776 | -0.1316344692 |
| H | -2.7083491380 | -0.7554287380 | -0.2826089001 |
| O | -3.5186521565 | 0.6999685080  | 2.6984583693  |
| H | -2.7239360737 | 0.7281090433  | 3.2069000199  |
| H | -3.4252630863 | -0.0141738048 | 2.0884110819  |
| O | -4.8943894596 | 1.8705669160  | -1.6922662682 |
| H | -5.0811457394 | 0.9454425987  | -1.7043304168 |
| H | -4.6018441324 | 2.0768972563  | -0.8189258556 |
| O | -1.3246486906 | -0.7924395071 | -1.6474127037 |
| H | -0.4451190503 | -0.4944131828 | -1.4786336295 |
| H | -1.2584678062 | -1.6949189658 | -1.9157955855 |
| O | -0.0439352546 | -0.0931474026 | 1.4598096250  |
| H | -0.2813379452 | 0.2471182040  | 2.3075936385  |
| H | -0.4187506625 | -0.9573085312 | 1.3996647348  |
| O | -5.3628306936 | -1.0666624688 | -1.7451694400 |
| H | -4.8863024957 | -1.5035926068 | -2.4328404261 |
| H | -6.2468037274 | -1.3960783806 | -1.7760771512 |
| O | -0.8292836081 | 0.9777637996  | 3.9598259679  |
| H | -0.4365792803 | 0.4079239129  | 4.6016548147  |
| H | -0.3866830303 | 1.8086470873  | 4.0277681859  |
| O | -1.3404117463 | -2.6108122197 | 1.4566852258  |
| H | -0.9800527916 | -3.1883703529 | 0.8028913129  |
| H | -2.2165252800 | -2.3979657204 | 1.1774006076  |
| O | -0.6195295986 | 3.2440696467  | -2.5838429324 |
| H | -0.7572838718 | 2.8005327272  | -1.7621512534 |
| H | -1.4542679112 | 3.2654063440  | -3.0238828726 |
| O | -3.2781655058 | 2.7975049727  | -3.7297502710 |
| H | -3.7560544572 | 3.3505037715  | -4.3269880233 |
| H | -3.8821245838 | 2.5481810584  | -3.0486119062 |
| O | 1.0707463434  | 3.7477656663  | 1.0176494775  |
| H | 1.1472021884  | 3.7068045599  | 1.9575192268  |
| H | 0.2623226781  | 3.3159281912  | 0.7921588421  |
| O | -2.1386719877 | 0.1434056675  | -4.1836385720 |
| H | -1.9187788239 | 0.0286291225  | -3.2729510321 |
| H | -2.5117810120 | 1.0064787980  | -4.2659360908 |
| O | 1.3662027212  | 0.0669087882  | -1.6859066669 |
| H | 1.4352733348  | 0.5020698467  | -2.5206177292 |
| H | 1.7718158637  | 0.6341764511  | -1.0498533426 |
| O | 1.2336920296  | 3.1024879992  | 3.9070054614  |
| H | 1.8537524076  | 2.4005741554  | 4.0241401603  |

|   |               |               |               |
|---|---------------|---------------|---------------|
| H | 1.4363523776  | 3.7549782900  | 4.5582071643  |
| O | -3.7676215561 | -2.2380453189 | -3.6999338896 |
| H | -3.0954707537 | -2.8220269725 | -3.3867930569 |
| H | -3.3273447111 | -1.5303673896 | -4.1429087221 |
| O | 1.4245557616  | 5.1294396192  | -1.6164435886 |
| H | 0.6564574861  | 4.7460071446  | -2.0087228648 |
| H | 1.3515866616  | 4.9911090629  | -0.6856274834 |
| O | -1.2267901451 | -3.4853791115 | -2.6334700080 |
| H | -1.0004588520 | -4.0742297168 | -1.9313962481 |
| H | -0.5099155564 | -3.5066022463 | -3.2470813318 |
| O | 0.6760482855  | -1.0195279322 | 5.4025223059  |
| H | 0.5504568506  | -1.8069108098 | 4.8974149414  |
| H | 0.6116100905  | -1.2669144593 | 6.3111069631  |
| O | 2.8959201021  | 2.0047697549  | -0.2577142380 |
| H | 2.3842461520  | 2.6770967431  | 0.1630524951  |
| H | 3.3610621199  | 2.4210130122  | -0.9657134670 |
| O | 0.2534347132  | -4.2326610983 | -0.1738476166 |
| H | 0.6761607422  | -4.7300245457 | 0.5079226964  |
| H | 0.9196976697  | -3.6935523493 | -0.5692384153 |
| O | 0.1300659900  | -3.2627984902 | 3.8661100424  |
| H | 0.7886457011  | -3.7881074929 | 3.4404321480  |
| H | -0.5287169763 | -3.0750934327 | 3.2167640108  |
| O | 2.8397739277  | -0.2210118530 | 1.5766984770  |
| H | 3.1725254897  | 0.4546442171  | 1.0078015382  |
| H | 1.9010155986  | -0.2201974226 | 1.4786648596  |
| O | 1.5244285799  | 1.8614398784  | -3.8528595832 |
| H | 2.3123488085  | 2.3627168771  | -3.7158138315 |
| H | 0.8050978466  | 2.4049068487  | -3.5734219292 |
| O | 2.7131542773  | 0.7960943183  | 4.2808949307  |
| H | 2.1874193389  | 0.1577727488  | 4.7358969114  |
| H | 2.9700807516  | 0.4022608899  | 3.4625047599  |
| O | 2.0947647148  | -2.6440884541 | -1.6381617222 |
| H | 2.0261206893  | -2.9272828179 | -2.5359185959 |
| H | 1.9064330661  | -1.7192383748 | -1.6302893086 |
| O | 0.4560294402  | -0.5004221892 | -5.2838033406 |
| H | -0.4466907386 | -0.2920493224 | -5.1033719647 |
| H | 0.9643883621  | 0.2532171296  | -5.0298792621 |
| O | 1.0766636773  | -3.0384273739 | -4.3579531884 |
| H | 1.3566524482  | -3.5754516707 | -5.0818935498 |
| H | 0.9217769057  | -2.1744758543 | -4.7050501688 |
| O | 3.5306117468  | 3.6624833787  | -2.6294335004 |
| H | 4.2952117463  | 4.1195079642  | -2.9415133348 |
| H | 2.9169573744  | 4.3216966244  | -2.3470425266 |
| O | 2.0128055271  | -4.7903611262 | 2.1525748127  |
| H | 2.4878760812  | -5.5481331087 | 2.4541839062  |
| H | 2.6524962957  | -4.1900242893 | 1.8043365940  |
| O | 3.6099744250  | -2.9433938889 | 0.8762150953  |
| H | 3.5061251325  | -2.0603490732 | 1.1929573122  |
| H | 3.3730559629  | -2.9335219191 | -0.0373770679 |

Coordinates Figure 6(b).

96

Energy -316.853667005944

|   |               |               |               |
|---|---------------|---------------|---------------|
| O | 3.6309697125  | -2.6651772485 | 3.1141607811  |
| H | 2.8152756232  | -2.2415933730 | 3.3288659446  |
| H | 4.1337294229  | -2.7058812255 | 3.9119416494  |
| O | 2.5380254790  | 0.5738630412  | -2.6154473183 |
| H | 2.2170379460  | 1.4421160718  | -2.4311048852 |
| H | 3.4727028511  | 0.6475866292  | -2.7241740245 |
| O | -1.7244665214 | 1.4484462969  | 1.5464615312  |
| H | -2.0150036260 | 2.0698026849  | 2.1948309352  |
| H | -0.8102428160 | 1.2865555472  | 1.7163581341  |
| O | 6.7403205965  | -1.1832275006 | -3.5993574746 |
| H | 6.4298313762  | -1.8601447606 | -3.0194799692 |
| H | 6.4905793132  | -1.4387882473 | -4.4729686297 |
| O | 3.0194758714  | -5.0604216394 | 1.5430658491  |
| H | 2.0767536039  | -5.0229713302 | 1.5156677708  |
| H | 3.3049828234  | -4.3281891846 | 2.0657510953  |
| O | -1.3084852087 | -2.8295924592 | 2.8168813567  |
| H | -1.7987165794 | -2.3117619515 | 2.1984937578  |
| H | -1.8905076294 | -3.0161372161 | 3.5361375068  |
| O | 4.2496116587  | -5.4559754290 | -0.9249591858 |
| H | 4.7698946899  | -6.2422730159 | -0.8811399400 |
| H | 3.8570371913  | -5.3426782448 | -0.0741199003 |
| O | 0.9797096479  | 0.7879458884  | 1.6560866404  |
| H | 1.1440538559  | 0.2082286655  | 0.9295899942  |
| H | 1.5920734990  | 1.5018737519  | 1.5773721330  |
| O | -2.7045701162 | -1.2525707097 | 1.0453501063  |
| H | -2.5688460229 | -0.3367877503 | 1.2291951388  |
| H | -2.5276405344 | -1.3738679914 | 0.1261867114  |
| O | -1.5328739566 | -1.4056983456 | -1.6267135765 |
| H | -0.8790212779 | -2.0794698706 | -1.5298267315 |
| H | -1.8023590960 | -1.4172539854 | -2.5312149203 |
| O | 2.0854205814  | -4.8730781062 | -2.8399663056 |
| H | 2.4646718888  | -4.3696498760 | -3.5425379510 |
| H | 2.8032625996  | -5.1928894535 | -2.3171833745 |
| O | -0.0083021805 | 3.0022162037  | -5.8418003402 |
| H | -0.6634633377 | 2.6317451100  | -5.2722448286 |
| H | -0.4590957292 | 3.5876321909  | -6.4291262740 |
| O | 1.1927664211  | -1.3934751225 | 3.5709555631  |
| H | 0.4075654164  | -1.8781069993 | 3.3722855346  |
| H | 1.1348660254  | -0.5779659238 | 3.0992875177  |
| O | 2.8487719638  | 2.8331864674  | 0.8324833096  |
| H | 3.1351767560  | 3.5961616644  | 1.3086341237  |
| H | 3.6278511428  | 2.3781325103  | 0.5552830516  |
| O | 4.3319207144  | -1.3553983553 | 0.5741087068  |
| H | 4.3586104950  | -1.7826073536 | 1.4153331605  |
| H | 3.4206060219  | -1.2372842300 | 0.3586254389  |
| O | 1.3092935257  | 2.8837663984  | -1.6457922794 |

|   |               |               |               |
|---|---------------|---------------|---------------|
| H | 0.4521049225  | 2.5153761736  | -1.5029819333 |
| H | 1.6966840713  | 3.0076112485  | -0.7940473221 |
| O | 5.0873681655  | -2.8018300618 | -1.8233334763 |
| H | 4.9360864536  | -2.2846861912 | -1.0483789519 |
| H | 4.9803792907  | -3.7052375550 | -1.5717649252 |
| O | 5.0440836822  | 1.4148056069  | 0.0263013090  |
| H | 5.2404852261  | 1.4227320623  | -0.8968682631 |
| H | 4.9986979263  | 0.5085730084  | 0.2862264226  |
| O | 4.7938492837  | 3.0519062562  | -4.8877934295 |
| H | 5.3089226948  | 3.8047224297  | -5.1303746409 |
| H | 3.9317777025  | 3.3707530542  | -4.6732060058 |
| O | 5.2942305779  | 1.0935305244  | -2.8466146515 |
| H | 5.8724602679  | 0.3979653365  | -3.1162773095 |
| H | 5.3539250525  | 1.7667189122  | -3.5055019093 |
| O | 3.5200141589  | -2.7861601235 | -4.2707070809 |
| H | 4.1131950949  | -2.5933523279 | -4.9791137333 |
| H | 3.9849896600  | -2.6028774516 | -3.4700300551 |
| O | 1.7823257771  | -0.9322015339 | -0.4220406238 |
| H | 1.3475300472  | -1.7357572839 | -0.6589568199 |
| H | 1.9913792121  | -0.4888532119 | -1.2286491911 |
| O | 0.4946183668  | -3.3393751098 | -1.1137405390 |
| H | 0.3561408968  | -3.9047382263 | -0.3707284322 |
| H | 0.9540040546  | -3.8499026390 | -1.7612008743 |
| O | -1.4813248016 | -1.1231292835 | -4.5070949800 |
| H | -1.8460798811 | -1.6125213705 | -5.2270446805 |
| H | -0.5427140421 | -1.1725602271 | -4.5933786868 |
| O | 2.2378873135  | 3.9550041385  | -4.2316827221 |
| H | 1.9286829364  | 3.7835467478  | -3.3565407505 |
| H | 1.5450654262  | 3.6987973875  | -4.8192492182 |
| O | -1.8607543529 | 1.7758199457  | -4.1628900727 |
| H | -1.7540151613 | 1.8896523134  | -3.2320155424 |
| H | -1.8874714433 | 0.8457030005  | -4.3211528903 |
| O | 5.4263838916  | -1.6836041460 | -6.1602047744 |
| H | 5.7970840941  | -2.0633523195 | -6.9407501854 |
| H | 5.1051938609  | -0.8291884674 | -6.4003906744 |
| O | 1.3070664850  | -1.0071185315 | -4.5747771901 |
| H | 1.6317372394  | -0.3928241615 | -3.9359424837 |
| H | 1.9027420171  | -1.7392721240 | -4.5742959941 |
| O | -1.1690914388 | 1.4569460222  | -1.3121420020 |
| H | -1.0885436883 | 0.5175195669  | -1.3553675631 |
| H | -1.5996265574 | 1.6550350934  | -0.4958830446 |
| O | 4.4606650751  | 0.8137710782  | -6.8223282138 |
| H | 4.6506293509  | 1.5234457156  | -6.2297457833 |
| H | 3.5301917004  | 0.8333102432  | -6.9795413625 |
| O | 1.6055051242  | 0.7295820976  | -6.8872515541 |
| H | 1.4302602759  | 0.0876721409  | -6.2178344160 |
| H | 1.1172918215  | 1.5034207005  | -6.6555188595 |
| O | 0.0708556729  | -4.8259484922 | 1.3450281410  |
| H | -0.4455826979 | -5.6159452208 | 1.3363660428  |
| H | -0.3722345745 | -4.2184281381 | 1.9155266127  |

Coordinates Figure 6(c).

96

Energy -316.732596776585

|   |               |               |               |
|---|---------------|---------------|---------------|
| O | 1.7839649926  | 6.5950534232  | 3.4289318935  |
| H | 2.0635806991  | 7.4958869081  | 3.4634651120  |
| H | 2.4738503473  | 6.0817570860  | 3.8181150401  |
| O | -2.7866179454 | 4.2798100199  | 2.7481773844  |
| H | -2.2793619003 | 4.0709399891  | 1.9800998695  |
| H | -2.2221268632 | 4.7755773340  | 3.3195293272  |
| O | 2.2637182483  | 0.5465461296  | 2.6018848042  |
| H | 1.3595723139  | 0.8138947779  | 2.5580295461  |
| H | 2.3426759856  | -0.0211601961 | 3.3517872362  |
| O | 0.3320529164  | -3.2998423435 | -0.9733647866 |
| H | -0.3368887887 | -3.6253192579 | -0.3924515164 |
| H | 0.0798754174  | -2.4224023675 | -1.2129144716 |
| O | 2.0268094005  | -1.1624508407 | 4.7812951561  |
| H | 2.3740498635  | -0.8100486757 | 5.5851080878  |
| H | 1.0983212473  | -1.2712063944 | 4.9115273830  |
| O | -2.4840940309 | -0.1200501966 | 3.0900590345  |
| H | -3.2044946127 | 0.4581966160  | 3.2837910135  |
| H | -2.6952909282 | -0.5542589178 | 2.2790491017  |
| O | 3.7051729056  | 4.7928716470  | 4.3033718165  |
| H | 3.4624439731  | 4.2476310505  | 5.0345857464  |
| H | 3.8976575734  | 4.2125101607  | 3.5843386796  |
| O | -4.0570136545 | 2.1345012479  | 3.9374591906  |
| H | -4.9872140352 | 2.2945139365  | 3.9387419051  |
| H | -3.6553449508 | 2.8727637285  | 3.5079138307  |
| O | 2.8327755945  | -3.2135582140 | 0.1934924070  |
| H | 3.4278576581  | -3.8429186936 | -0.1815558277 |
| H | 1.9941898498  | -3.3557913395 | -0.2156801005 |
| O | -1.6039276720 | -0.3915288709 | 7.6386057363  |
| H | -0.8178795187 | -0.0495914058 | 8.0336823423  |
| H | -2.0583567781 | -0.8729896243 | 8.3113376179  |
| O | -0.0394788707 | -0.3209950771 | -0.9066553290 |
| H | -0.2140341016 | 0.4740837152  | -1.3844195381 |
| H | 0.8343880295  | -0.2421485985 | -0.5587784432 |
| O | 3.5980153433  | 2.9474172972  | 2.0048664157  |
| H | 4.0611521408  | 2.7727864347  | 1.2011955734  |
| H | 3.2469351326  | 2.1226159253  | 2.3003724845  |
| O | -0.2894367129 | 2.4369192784  | -2.0186364529 |
| H | 0.5535945893  | 2.8612628800  | -2.0290856326 |
| H | -0.7180771254 | 2.6651498463  | -2.8279921588 |
| O | 0.7107884085  | 0.7430687581  | 8.6676283943  |
| H | 1.5079957550  | 0.4888097144  | 8.2309463138  |
| H | 0.7130985482  | 1.6860148299  | 8.7091714195  |
| O | 4.1877550590  | 1.9136696470  | -0.7272679938 |
| H | 3.7596935723  | 1.0805081488  | -0.6111485055 |
| H | 4.9800661766  | 1.7463412420  | -1.2121625718 |
| O | -0.8479740639 | 3.4294647486  | 0.6877451022  |

|   |               |               |               |
|---|---------------|---------------|---------------|
| H | -0.0665742916 | 3.9561457322  | 0.7415966706  |
| H | -0.9094987005 | 3.1257404711  | -0.2037955511 |
| O | 2.4762180217  | 3.0306179985  | 6.3164676840  |
| H | 1.7002185163  | 2.8852029045  | 5.7992079117  |
| H | 2.1917989932  | 3.4156914661  | 7.1299187857  |
| O | 2.1011823204  | 3.7929004945  | -1.6161483237 |
| H | 2.8421942063  | 3.2446190798  | -1.4132509865 |
| H | 1.9796968305  | 4.3687825684  | -0.8782597368 |
| O | 1.5997136796  | 4.7839998933  | 1.1183102467  |
| H | 1.5513754096  | 5.5463510116  | 1.6727132031  |
| H | 2.2126444451  | 4.1919187007  | 1.5240616388  |
| O | 3.1357203682  | 0.4029612085  | 6.9860140833  |
| H | 4.0138439605  | 0.2493616929  | 7.2961505043  |
| H | 3.1074910425  | 1.2963477202  | 6.6827945259  |
| O | -2.3709482802 | 2.0396511075  | 6.2803925526  |
| H | -3.0316785384 | 1.9554231766  | 5.6116477316  |
| H | -2.3427930367 | 1.2153293985  | 6.7392819253  |
| O | -1.6208897689 | -4.0429136583 | 1.0540393799  |
| H | -2.1808461008 | -4.8005785531 | 0.9968443839  |
| H | -1.2233362012 | -4.0633827103 | 1.9098493079  |
| O | -0.6923850418 | 5.3663956757  | 4.5230794408  |
| H | -0.2748578285 | 4.5253093321  | 4.6185951088  |
| H | -0.0363625156 | 5.9589180229  | 4.1922771324  |
| O | -0.3138593857 | 1.4684469277  | 2.5720709254  |
| H | -0.5578524871 | 2.0674934391  | 1.8846925015  |
| H | -1.0371790338 | 0.8720422822  | 2.6815635717  |
| O | -0.3974623877 | -4.0535652319 | 3.5266754739  |
| H | 0.5422874863  | -4.0670353077 | 3.4396859032  |
| H | -0.6047861258 | -3.3507449043 | 4.1216031239  |
| O | -0.8326256634 | -1.4913863678 | 5.0284055712  |
| H | -1.3838553545 | -1.0362110592 | 4.4120941887  |
| H | -1.1523274133 | -1.2749062304 | 5.8896869395  |
| O | -1.4684476267 | 4.6354734062  | 7.3332974089  |
| H | -1.9647164934 | 3.8715968259  | 7.0861370641  |
| H | -1.3354478098 | 5.1389734750  | 6.5461016369  |
| O | 2.7424608489  | -0.3507805537 | 0.0670643565  |
| H | 2.6496101454  | -0.1441125051 | 0.9833315220  |
| H | 2.9678883633  | -1.2659538994 | 0.0168783304  |
| O | 0.8197114023  | 3.7201589757  | 8.6153300669  |
| H | 0.0455462481  | 4.0873158443  | 8.2194227522  |
| H | 0.9664075284  | 4.1964279792  | 9.4169075972  |
| O | 2.4102140323  | -3.5968514700 | 3.1441289846  |
| H | 2.6128192572  | -3.3916799498 | 2.2453886305  |
| H | 2.5533681798  | -2.8075383392 | 3.6414921573  |
| O | -2.4308130306 | -1.2932108954 | 0.6115197084  |
| H | -1.6883999583 | -0.9303360791 | 0.1554241572  |
| H | -2.2788522810 | -2.2221517915 | 0.6811989468  |
| O | 0.0663267198  | 2.7263534885  | 4.9646453189  |
| H | 0.0073709630  | 2.2686639287  | 4.1412845597  |
| H | -0.6670251559 | 2.4418340847  | 5.4862986419  |

Coordinates Figure 7(a).

99

Energy -325.768527792549

|   |               |               |               |
|---|---------------|---------------|---------------|
| O | 0.0102969424  | 4.8652819401  | -4.5734691602 |
| H | 0.2671410555  | 5.6395275370  | -5.0482884010 |
| H | -0.7482409121 | 4.5162927837  | -5.0135888553 |
| O | -2.9164382896 | 3.3878785899  | 1.6241601595  |
| H | -3.0600070536 | 4.2900223130  | 1.3866666505  |
| H | -2.7866295407 | 3.3707846302  | 2.5588985931  |
| O | -1.7227739996 | -1.2807044529 | -3.1589569184 |
| H | -1.8433607119 | -1.0596040978 | -4.0686007673 |
| H | -1.6928146170 | -2.2228441078 | -3.1104413537 |
| O | -3.4143021690 | 5.9761945758  | 0.7839725516  |
| H | -2.7166852385 | 6.4801454488  | 0.3963611612  |
| H | -4.1443375738 | 6.0197551165  | 0.1872906924  |
| O | -3.6287307775 | 5.4811960206  | -5.5714625064 |
| H | -3.5166117497 | 4.9309834865  | -6.3301284045 |
| H | -3.5690618811 | 4.9177983139  | -4.8165445633 |
| O | -5.1854650049 | 1.9341367169  | 0.4249422213  |
| H | -4.8161180661 | 1.2611876859  | -0.1242398018 |
| H | -4.4626421846 | 2.3524060759  | 0.8647789727  |
| O | 0.3942463398  | 7.1921092334  | -6.2873496517 |
| H | 0.2160390964  | 6.8746939369  | -7.1581930142 |
| H | 1.1710539917  | 7.7249770786  | -6.3465120188 |
| O | -4.2900183114 | 8.6361466223  | -7.3692522083 |
| H | -3.6296081729 | 8.6975154809  | -6.6977086384 |
| H | -5.0521727763 | 8.2522957103  | -6.9659440097 |
| O | -7.7652711740 | 4.5488754337  | -5.7351794373 |
| H | -8.6538220102 | 4.4704378593  | -6.0437299396 |
| H | -7.7226867268 | 4.0902016187  | -4.9113570351 |
| O | -5.9678392978 | 8.1223513922  | -3.0760519515 |
| H | -6.0492088526 | 7.7642903096  | -3.9455631421 |
| H | -6.5587756779 | 8.8568120562  | -3.0287213928 |
| O | 0.6716546364  | 1.9613879961  | -4.5864393641 |
| H | 0.7293331015  | 1.5198436288  | -3.7542193089 |
| H | 0.8917951074  | 2.8657154102  | -4.4295682218 |
| O | -1.3233789795 | 2.3401531389  | -0.5809515313 |
| H | -1.6564253113 | 2.5576147039  | 0.2750093689  |
| H | -1.1768006560 | 3.1569922163  | -1.0305815690 |
| O | -2.2902951806 | 7.9415812407  | -5.3737782857 |
| H | -2.6347068806 | 7.0646995340  | -5.4315494499 |
| H | -1.3780813153 | 7.8909103080  | -5.6107946871 |
| O | -5.4372863435 | 5.9106255108  | -1.2955083245 |
| H | -5.7899293925 | 6.6600690074  | -1.7481182884 |
| H | -6.1672410371 | 5.3472303293  | -1.0939383150 |
| O | 0.3901663759  | 0.5344746151  | -2.1847670130 |
| H | -0.2112973558 | -0.1589584914 | -2.4044721799 |
| H | -0.0028861932 | 1.0205953990  | -1.4776074020 |
| O | -1.0340870882 | 4.8517818319  | -1.9617140228 |

|   |               |               |                |
|---|---------------|---------------|----------------|
| H | -1.0258792268 | 5.6923725023  | -1.5325073012  |
| H | -0.5193754295 | 4.9434011435  | -2.7475615043  |
| O | -6.0145574654 | 6.8916593089  | -5.5804741043  |
| H | -5.2188068680 | 6.3840579680  | -5.5810393846  |
| H | -6.7235071993 | 6.2848541376  | -5.7220940640  |
| O | -3.3277535356 | 0.5170453646  | -1.4872533917  |
| H | -2.6247202961 | 1.1086144165  | -1.2712238222  |
| H | -2.9359371689 | -0.2213871808 | -1.9255178835  |
| O | -3.6543528091 | 4.4504579044  | -2.9543008549  |
| H | -2.7925988320 | 4.4958151016  | -2.5719381190  |
| H | -4.2172589504 | 4.9865095201  | -2.4188909228  |
| O | -0.9564053662 | 3.2816611152  | -8.2486152593  |
| H | -1.1451861947 | 3.1583066779  | -7.3320870624  |
| H | -0.4968126574 | 2.5094310292  | -8.5372563693  |
| O | 0.3409842526  | 0.6433952809  | -7.1226825885  |
| H | 1.0425503347  | 0.0658331664  | -7.3778403643  |
| H | 0.6220434802  | 1.0798893213  | -6.3344205017  |
| O | -5.9027107032 | 2.9589026642  | -7.4759537214  |
| H | -6.4957304511 | 3.4936477010  | -6.9727104618  |
| H | -5.2863565116 | 3.5465828200  | -7.8829156349  |
| O | -3.1424606991 | 7.0823748537  | -9.3746277712  |
| H | -3.3653766536 | 7.4131856557  | -10.2300523117 |
| H | -3.5383669950 | 7.6653261587  | -8.7466911224  |
| O | -2.0949340700 | -0.6349373983 | -5.8717078505  |
| H | -1.3899689601 | -0.2896612126 | -6.3958137592  |
| H | -2.8521122866 | -0.1001270763 | -6.0492959188  |
| O | -1.7784772472 | 2.8372782273  | -5.6411038179  |
| H | -1.1800959637 | 2.2698607165  | -5.1819135936  |
| H | -2.6011525382 | 2.3776876164  | -5.6945854977  |
| O | -3.0545856520 | 8.7322263121  | -2.7244156369  |
| H | -2.7587065379 | 8.5873481999  | -3.6089179470  |
| H | -3.9848113122 | 8.5724185327  | -2.7199268914  |
| O | -0.3917992138 | 6.1333500962  | -8.6899792540  |
| H | -0.4784908859 | 5.1941710267  | -8.6538450118  |
| H | -1.2257118542 | 6.4720246507  | -8.9741758555  |
| O | -3.5891551733 | 4.4688363705  | -8.2771533556  |
| H | -3.5324667209 | 5.2748698089  | -8.7649801381  |
| H | -2.8550661705 | 3.9385335640  | -8.5431810297  |
| O | -7.5590716923 | 3.0349306502  | -3.3962311012  |
| H | -6.7848407358 | 2.4962646577  | -3.4320616539  |
| H | -7.6256176620 | 3.3557489829  | -2.5110612387  |
| O | -1.4951509361 | 7.4690419172  | -0.8304793379  |
| H | -2.0268607761 | 7.9313872045  | -1.4584920251  |
| H | -0.8909028281 | 8.0986552965  | -0.4708271856  |
| O | -4.9079063635 | 1.9707153892  | -3.3017893155  |
| H | -4.5393594086 | 1.3720127118  | -2.6720221361  |
| H | -4.4601367003 | 2.7937720048  | -3.1879535121  |
| O | -4.1561496936 | 1.3944994032  | -5.8915591135  |
| H | -4.5636582548 | 1.4489796510  | -5.0419432419  |
| H | -4.7756845458 | 1.7431521604  | -6.5124425776  |
| O | -7.1397250829 | 3.7281257615  | -0.5493532948  |
| H | -7.8168179079 | 3.7191447521  | 0.1081747288   |
| H | -6.4891438772 | 3.1006993284  | -0.2773999533  |

Coordinates Figure 7(b).

99

Energy -325.72034733038

|   |               |               |               |
|---|---------------|---------------|---------------|
| O | -0.1075827694 | 7.9698723211  | -3.5012454272 |
| H | 0.5930139679  | 7.3611759784  | -3.6730925343 |
| H | 0.0559734061  | 8.7298917052  | -4.0365008497 |
| O | -1.7917933518 | -2.1568478326 | -1.1040246185 |
| H | -2.5484936172 | -1.6144122800 | -0.9489542030 |
| H | -1.3985102639 | -2.3210161387 | -0.2618514570 |
| O | 2.0671164410  | 2.0183843216  | -1.5893505201 |
| H | 1.8488925666  | 1.9060654360  | -0.6779552916 |
| H | 2.3844647335  | 2.9020937977  | -1.6854029906 |
| O | -2.0212829196 | 3.0220283087  | 3.5206206008  |
| H | -1.7153877666 | 2.4556841536  | 4.2109545109  |
| H | -1.8612885980 | 2.5697510172  | 2.7077703547  |
| O | -0.3322773089 | 5.1076733756  | -0.0299075909 |
| H | -0.3688272470 | 5.0186695561  | 0.9090390935  |
| H | -1.1527591551 | 4.7833209225  | -0.3652931605 |
| O | -0.8980588849 | 7.8180191903  | 3.3566213809  |
| H | -1.1400759098 | 8.2798737557  | 4.1433847342  |
| H | -1.6001261130 | 7.9475041011  | 2.7391963093  |
| O | 2.2333128502  | 4.8463964931  | -1.2189994841 |
| H | 2.8139469787  | 5.2267188469  | -0.5793922843 |
| H | 1.3664618789  | 4.8697800415  | -0.8463051626 |
| O | 2.0464647037  | 1.5914922667  | 4.7101771819  |
| H | 2.2535017778  | 2.3652539379  | 4.2108706826  |
| H | 2.6021606899  | 0.9016268428  | 4.3843457501  |
| O | 3.3570631238  | 6.0872292644  | 1.2238345949  |
| H | 4.2088645395  | 6.4788301924  | 1.3332033082  |
| H | 2.7231639928  | 6.7701043109  | 1.3746060002  |
| O | -0.3172535260 | 5.0723249229  | 2.8207967718  |
| H | -0.9711655926 | 4.5201776908  | 3.2188054365  |
| H | -0.4616226929 | 5.9448115912  | 3.1506497866  |
| O | -2.8253828544 | 4.7068486063  | -1.2994168924 |
| H | -2.7725675576 | 5.2114414538  | -2.0953283553 |
| H | -3.5243629057 | 5.0807339213  | -0.7870546052 |
| O | 1.4593712213  | 8.1290212037  | 1.5605093542  |
| H | 0.9336082553  | 8.2602126726  | 0.7876959510  |
| H | 0.8637079186  | 8.0995901006  | 2.2920812878  |
| O | -4.6501207108 | 0.5524446818  | 1.9282652252  |
| H | -4.0171418301 | 0.1178709373  | 2.4772295695  |
| H | -4.5096861191 | 0.2366796858  | 1.0499435035  |
| O | -1.9026869839 | -0.4912625873 | 2.9248100096  |
| H | -1.7200562409 | 0.1787164421  | 2.2855506210  |
| H | -1.5498687426 | -0.1865483682 | 3.7455090941  |
| O | 2.4868736968  | -0.9107038897 | -1.6794279129 |
| H | 1.7478366594  | -1.1410938204 | -2.2194493858 |
| H | 2.6484545316  | 0.0087426141  | -1.8186694817 |
| O | 1.6102340520  | 5.8565627535  | -3.8599061423 |

|   |               |               |               |
|---|---------------|---------------|---------------|
| H | 1.0949202794  | 5.1423458224  | -4.1993532592 |
| H | 1.9830944978  | 5.5589731089  | -3.0454775417 |
| O | -0.3359023639 | 3.8139619428  | -4.8183061836 |
| H | -0.3375794820 | 3.0028576295  | -4.3356205361 |
| H | -0.3330312758 | 3.5847636270  | -5.7339143656 |
| O | -0.6077833611 | -2.5309696123 | 1.5690131643  |
| H | -1.0840783992 | -1.9543774338 | 2.1448281957  |
| H | -0.6458715381 | -3.3916195186 | 1.9546418504  |
| O | -2.3694332419 | 1.9761393092  | -1.4194917990 |
| H | -1.6813706327 | 1.8700677331  | -2.0568277548 |
| H | -2.6438124181 | 2.8781408711  | -1.4640754730 |
| O | -0.1662962308 | 1.5231053740  | -3.1457175902 |
| H | 0.6089988285  | 1.6860011069  | -2.6326279244 |
| H | -0.1668585264 | 0.6019374980  | -3.3514550011 |
| O | -0.6544649734 | 1.0159669176  | 5.1365049389  |
| H | -0.7544919227 | 0.8637651047  | 6.0626300232  |
| H | 0.2614576397  | 1.1882862517  | 4.9872726773  |
| O | 3.5477315844  | -0.5350471984 | 3.3862624483  |
| H | 3.1257806524  | -0.9042064583 | 2.6269487411  |
| H | 4.4754970899  | -0.6648575331 | 3.2710283480  |
| O | -4.5827700313 | 5.6390677929  | 0.7404766734  |
| H | -5.4627472780 | 5.9707445151  | 0.6597979810  |
| H | -4.6210761876 | 4.9113620698  | 1.3403562221  |
| O | 1.4502246334  | 1.6046244797  | 1.0888287465  |
| H | 1.7329783171  | 0.7461621967  | 1.3608054314  |
| H | 1.8170853802  | 2.2187923324  | 1.7045311870  |
| O | 2.1930604371  | 3.7850913713  | 2.7172322202  |
| H | 1.3785727976  | 4.2512459024  | 2.8181692906  |
| H | 2.7997944572  | 4.3837161580  | 2.3117687228  |
| O | -4.6959333445 | 3.4710561146  | 2.5109211141  |
| H | -4.8597387439 | 2.5822489756  | 2.2387665352  |
| H | -3.9418642405 | 3.4465061322  | 3.0780679547  |
| O | -3.9904173117 | -0.2070625150 | -0.8728239511 |
| H | -3.5371099959 | 0.5733991889  | -1.1489950216 |
| H | -4.7232484721 | -0.3163996499 | -1.4575310020 |
| O | -1.3068003525 | 1.6074013370  | 1.1866406305  |
| H | -0.3773257118 | 1.6698399335  | 1.0347960784  |
| H | -1.7259925317 | 1.7034503600  | 0.3464436559  |
| O | 1.9730549834  | -1.1818726383 | 1.1089742305  |
| H | 1.1806016576  | -1.6840555911 | 1.2124559312  |
| H | 2.2112708840  | -1.2357751245 | 0.1972581778  |
| O | -2.1974977366 | 5.8928402538  | -3.7306187209 |
| H | -1.6889707799 | 6.6868752033  | -3.6883423999 |
| H | -1.6574310111 | 5.2472324821  | -4.1576983285 |
| O | -0.4646197747 | 7.8473120950  | -0.6026646475 |
| H | -0.3886307112 | 8.0640396025  | -1.5181608538 |
| H | -0.3536295788 | 6.9124366787  | -0.5350807268 |
| O | -0.0596252743 | -1.3729725816 | -3.1233621189 |
| H | -0.1241560627 | -2.0049309054 | -3.8214616163 |
| H | -0.6610917468 | -1.6495618896 | -2.4505955239 |
| O | -2.6918250743 | 7.9457210685  | 1.2692284883  |
| H | -3.2423538561 | 7.1963643940  | 1.1071757532  |
| H | -2.1186088382 | 8.0274891620  | 0.5238322316  |

Coordinates Figure 7(c).

99

Energy -325.358848563249

|   |               |               |               |
|---|---------------|---------------|---------------|
| O | -3.0813706735 | -0.7144253992 | -0.9873970384 |
| H | -2.9894703837 | -1.4850416388 | -0.4501974460 |
| H | -2.4084463917 | -0.1115364901 | -0.7143103703 |
| O | 1.3883509940  | 1.3820677628  | 1.6522266063  |
| H | 1.8633856565  | 1.9251789569  | 1.0437442694  |
| H | 0.5188915551  | 1.7436292511  | 1.7169724812  |
| O | -1.0570143426 | 2.6461988996  | 1.7913654492  |
| H | -0.8471112075 | 3.4996148351  | 2.1356042746  |
| H | -1.7295621679 | 2.2871338758  | 2.3478096832  |
| O | 2.8900786011  | 2.7481101587  | -2.4789701454 |
| H | 2.0301866401  | 2.8885675152  | -2.8419246887 |
| H | 3.0594608031  | 1.8211721464  | -2.5335049521 |
| O | -0.1353922455 | 5.0272246854  | 3.0175094692  |
| H | 0.4057421480  | 4.7652895397  | 3.7451371223  |
| H | -0.8909981685 | 5.4589436195  | 3.3829638510  |
| O | 0.3936382365  | -1.7719842665 | 4.4261569319  |
| H | 0.6694491219  | -1.0600797736 | 4.9811333300  |
| H | 0.4543705898  | -2.5588184266 | 4.9439233269  |
| O | 0.2216650682  | -2.7585171139 | -0.2103412919 |
| H | 0.8117384886  | -2.4323551542 | 0.4501965107  |
| H | 0.2340068410  | -2.1335916111 | -0.9175854157 |
| O | 0.0534112344  | 3.1220947300  | -2.9122611429 |
| H | -0.2981319288 | 2.6170912171  | -2.1965326256 |
| H | -0.4881421439 | 2.9409862319  | -3.6637916508 |
| O | 1.5099661365  | 4.1099021390  | 5.0551504022  |
| H | 1.0315553168  | 3.7145414097  | 5.7662702482  |
| H | 2.1079690170  | 3.4545336176  | 4.7330275838  |
| O | 4.8791667836  | 1.9559043208  | 1.7465550222  |
| H | 5.7604834582  | 2.2739881024  | 1.6326160870  |
| H | 4.3180457697  | 2.5262675276  | 1.2458480479  |
| O | -1.9781405525 | -0.4867862439 | -3.7259476908 |
| H | -1.1072082663 | -0.6462898533 | -3.3989706189 |
| H | -2.5739344266 | -0.6974783643 | -3.0248649966 |
| O | -3.0757208173 | 5.5853237658  | -1.1228022417 |
| H | -3.4460863021 | 6.4029865091  | -1.4145821245 |
| H | -2.1386103961 | 5.6701692503  | -1.1969895466 |
| O | -2.2829374324 | -1.2820310929 | 3.2015772533  |
| H | -2.3339848207 | -1.8125057909 | 2.4225591451  |
| H | -1.4338504247 | -1.4401281209 | 3.5822805985  |
| O | -2.6025515681 | 3.1670644059  | 5.4431100602  |
| H | -2.6634965110 | 4.0060537507  | 5.0150200611  |
| H | -2.8423735727 | 2.5172805719  | 4.8019042982  |
| O | -5.3866143935 | 2.1963638846  | 1.6360720835  |
| H | -5.4156770661 | 1.7945690917  | 0.7824944599  |
| H | -6.2656204600 | 2.1690609719  | 1.9788275943  |
| O | -0.3474071202 | 5.6785036049  | -1.5662912005 |

|   |               |               |               |
|---|---------------|---------------|---------------|
| H | 0.2673355917  | 5.7142471063  | -0.8509645238 |
| H | -0.0871233940 | 4.9534784931  | -2.1116987758 |
| O | -1.4046942776 | 1.7209686297  | -0.8237286169 |
| H | -2.1851099244 | 2.0957060293  | -1.1997628623 |
| H | -1.2983631435 | 2.1137269297  | 0.0279245178  |
| O | 2.9029081335  | 1.8084249612  | 3.9781450540  |
| H | 2.3410069979  | 1.5990515889  | 3.2492360344  |
| H | 3.7866827937  | 1.8131451877  | 3.6467864513  |
| O | 1.3693416484  | 0.3290428940  | 5.9519258983  |
| H | 0.7920752695  | 1.0005407694  | 6.2786254315  |
| H | 2.0472616507  | 0.7681224131  | 5.4635488918  |
| O | -3.5139875558 | 2.9914393911  | -2.2316656025 |
| H | -3.2206819176 | 2.9264311098  | -3.1264416527 |
| H | -3.5013438220 | 3.9083254001  | -2.0079724276 |
| O | 0.3538008863  | -0.4446230805 | -1.9751088431 |
| H | -0.0185535990 | 0.2840333753  | -1.5046937490 |
| H | 1.2749499463  | -0.2629062474 | -2.0717621196 |
| O | -2.1366719681 | 2.1251609614  | -4.6094374917 |
| H | -2.3277887003 | 2.1890903913  | -5.5315361180 |
| H | -2.1240419530 | 1.2053384089  | -4.3981428899 |
| O | 1.3948666436  | 5.7512902032  | 0.7934671421  |
| H | 1.8430587722  | 6.5637103709  | 0.9666021792  |
| H | 0.8543001307  | 5.5738396491  | 1.5465790860  |
| O | 3.2179118145  | -0.1245382343 | -2.0954883152 |
| H | 3.6674829083  | -0.7112542881 | -2.6824538660 |
| H | 3.5707657925  | -0.2796843777 | -1.2339187019 |
| O | -5.2817059106 | 1.1359947223  | -0.8783274579 |
| H | -4.8956356273 | 1.7763987432  | -1.4542709278 |
| H | -4.7402629029 | 0.3645110275  | -0.9286348329 |
| O | 2.9072536321  | 3.3138627575  | 0.2199131973  |
| H | 2.5176686473  | 4.1561634833  | 0.3920511680  |
| H | 2.9671106427  | 3.2292850899  | -0.7182457501 |
| O | 4.1879565158  | -0.6439355618 | 0.4640814931  |
| H | 3.5664727568  | -1.1144856218 | 0.9962647628  |
| H | 4.4697077984  | 0.1009854890  | 0.9706259599  |
| O | -2.8045039848 | 5.6616867279  | 3.8235990554  |
| H | -3.2981316650 | 5.4289462385  | 3.0535068323  |
| H | -3.2169596663 | 6.4280709906  | 4.1888577674  |
| O | -2.3146568295 | -2.9028554638 | 0.7279997086  |
| H | -2.6924819045 | -3.7677875287 | 0.7236190934  |
| H | -1.4268134680 | -2.9930949941 | 0.4206408846  |
| O | -3.0998191322 | 1.4262821514  | 3.2087042518  |
| H | -2.9320212002 | 0.4979896145  | 3.2402522153  |
| H | -3.9148332788 | 1.5390734296  | 2.7462017951  |
| O | -4.1982608000 | 4.8922444775  | 1.5477364805  |
| H | -3.8171574444 | 5.0286641762  | 0.6950769047  |
| H | -4.5646702619 | 4.0224079454  | 1.5450968427  |
| O | 1.7120414425  | -1.4200297276 | 1.8320865229  |
| H | 1.4103847237  | -1.6694510494 | 2.6909640941  |
| H | 1.5162994508  | -0.5021517944 | 1.7317688954  |
| O | -0.2619574514 | 2.6301065691  | 6.8256635412  |
| H | -1.0858270708 | 2.7728194284  | 6.3877704674  |
| H | -0.4191049654 | 2.7575236401  | 7.7475897872  |

Coordinates Figure 7(d).

99

Energy -325.172022710616

|   |               |               |               |
|---|---------------|---------------|---------------|
| O | -4.2939445040 | 6.0926533948  | 0.5845768013  |
| H | -4.6744846586 | 5.7027066510  | 1.3552967127  |
| H | -3.9082562512 | 5.3894273836  | 0.0869864045  |
| O | -5.1101365164 | 2.1622563544  | -1.6944471503 |
| H | -4.8032427645 | 1.2703954218  | -1.7302068479 |
| H | -5.6851945189 | 2.2215591757  | -0.9483439917 |
| O | -3.2003668269 | 4.1750296972  | -1.1178376731 |
| H | -3.2232682965 | 4.6772538217  | -1.9166648793 |
| H | -3.7495298877 | 3.4199576763  | -1.2562740483 |
| O | -4.5884591685 | 0.1565113861  | 2.0805906469  |
| H | -3.7734911994 | 0.4459871538  | 1.7025569931  |
| H | -4.6924438889 | -0.7501020857 | 1.8395146327  |
| O | -1.4028004057 | -0.3154428222 | 4.6012001568  |
| H | -1.1851191204 | -0.7629778352 | 5.4032012318  |
| H | -2.2622784132 | 0.0554247330  | 4.7221681902  |
| O | -2.1482217787 | 2.3273275035  | -4.9753692799 |
| H | -3.0100092603 | 2.6589661895  | -4.7798786850 |
| H | -2.1068002474 | 2.2147495012  | -5.9115791411 |
| O | -5.2103876759 | 7.6114878969  | -1.6494159729 |
| H | -5.1023192678 | 7.1747785312  | -0.8196662497 |
| H | -6.1389832018 | 7.6606280593  | -1.8111999272 |
| O | -0.6467480099 | 6.0384065656  | 2.4855387143  |
| H | 0.1696935912  | 6.0044968499  | 2.0131493651  |
| H | -1.1178603754 | 6.7884918985  | 2.1594964063  |
| O | -0.1471483411 | 7.7630346867  | -1.1020907570 |
| H | 0.4964301524  | 7.2552887853  | -0.6342454018 |
| H | -0.8618700465 | 7.9124930142  | -0.5039991701 |
| O | 3.3544514081  | 3.6831371952  | -0.2088034871 |
| H | 4.2981861972  | 3.6796477032  | -0.2239997140 |
| H | 3.0686549863  | 3.2892100256  | -1.0175186683 |
| O | 0.9388654505  | -0.1991605168 | -2.2765472574 |
| H | 0.0984857914  | -0.1450744978 | -2.7028278989 |
| H | 1.3917234107  | -0.9322871833 | -2.6616750450 |
| O | -3.7567774016 | -2.3521018316 | 0.7708566762  |
| H | -4.0119460624 | -3.2608018496 | 0.7764857014  |
| H | -2.9171323261 | -2.3034474478 | 1.1992342575  |
| O | -2.2424974081 | 1.0558820469  | 0.7132449801  |
| H | -2.1167436697 | 1.9784710645  | 0.8678216793  |
| H | -1.3876590655 | 0.6568317994  | 0.7430570919  |
| O | -1.1642117167 | 4.6429506783  | 5.1137232212  |
| H | -0.9680629270 | 5.2632444318  | 4.4298813055  |
| H | -0.6500541995 | 3.8716324103  | 4.9359913135  |
| O | -4.5744222550 | 3.4243258843  | -4.3017148669 |
| H | -4.4196273525 | 4.3316389211  | -4.0926693089 |
| H | -4.9835263893 | 3.0373870815  | -3.5442251810 |
| O | -0.1113382138 | 3.7938808791  | -3.4941202168 |

|   |               |               |               |
|---|---------------|---------------|---------------|
| H | -0.7392845518 | 3.3195854963  | -4.0152782931 |
| H | -0.2839695875 | 4.7117945344  | -3.6301767649 |
| O | -2.2516355467 | 7.9550271321  | 0.9919056905  |
| H | -3.0009352852 | 7.4021973780  | 0.8376085135  |
| H | -2.5860032598 | 8.8068445867  | 1.2231711450  |
| O | 1.2478814812  | 5.6974934136  | 0.3396829573  |
| H | 0.6708512739  | 5.0461020653  | -0.0258357224 |
| H | 2.1237107728  | 5.3519458030  | 0.2733628636  |
| O | -1.3202419762 | -1.9840174804 | 2.1325910012  |
| H | -1.3853820685 | -1.5068067931 | 2.9443207483  |
| H | -0.6545522748 | -1.5555191370 | 1.6186602225  |
| O | 0.3448832961  | -0.1759208693 | 0.5506733826  |
| H | 0.9079801528  | 0.4990197481  | 0.8945564253  |
| H | 0.5693896237  | -0.2784253679 | -0.3603525175 |
| O | -3.8469984028 | 3.7942592804  | 5.3775162630  |
| H | -2.9656307730 | 4.1257797293  | 5.3129891597  |
| H | -4.1613049816 | 4.0248207954  | 6.2371273473  |
| O | -2.0251109663 | 3.5193388893  | 2.1414773850  |
| H | -1.5870667631 | 3.0528182180  | 2.8352743245  |
| H | -1.6239153309 | 4.3722967758  | 2.0926577154  |
| O | -0.4253222459 | 3.6782847484  | -0.6406013819 |
| H | -0.2397001946 | 3.5275583496  | -1.5536755634 |
| H | -1.3528983690 | 3.8402744870  | -0.5754836848 |
| O | 1.2840097941  | 2.3398489004  | 1.3492912896  |
| H | 0.6436073010  | 2.7535084784  | 0.7928302806  |
| H | 2.12111112530 | 2.7127395805  | 1.1232555796  |
| O | -6.2564235262 | 2.2398647581  | 0.9081290996  |
| H | -5.9736876453 | 2.9747732141  | 1.4285601105  |
| H | -5.9121036309 | 1.4651592026  | 1.3230430257  |
| O | -0.7661725191 | 6.6868577430  | -3.5846435806 |
| H | -0.5464944421 | 7.0587467646  | -2.7454066938 |
| H | -0.3967476131 | 7.2576045331  | -4.2393586290 |
| O | 2.2921896056  | 2.4401979638  | -2.4855488937 |
| H | 1.9334047564  | 1.5740078078  | -2.3766154290 |
| H | 1.6582611927  | 2.9364188610  | -2.9782740125 |
| O | -0.1629929761 | 2.1875323478  | 3.8503477591  |
| H | -0.3788174105 | 1.3000905085  | 4.0885603731  |
| H | 0.5034737777  | 2.1351248927  | 3.1840490432  |
| O | -4.7454024545 | 4.1244387764  | 2.6043142992  |
| H | -4.8243615064 | 4.1589967818  | 3.5442343312  |
| H | -3.8779917081 | 3.8031421897  | 2.4165763051  |
| O | -3.8948347306 | 0.8607494393  | 4.7971929482  |
| H | -3.9420612788 | 1.7919998581  | 4.9435512915  |
| H | -4.3462925736 | 0.6903900827  | 3.9859950934  |
| O | -3.5585436736 | -0.2515038449 | -1.3844036462 |
| H | -3.1044879148 | 0.2622553626  | -0.7357409459 |
| H | -3.8023961320 | -1.0619462553 | -0.9665549510 |
| O | -1.5431647261 | -0.0932399871 | -3.4617727507 |
| H | -2.2683380238 | -0.2463953565 | -2.8773537442 |
| H | -1.7601900957 | 0.6729916159  | -3.9683964509 |
| O | -3.5402078259 | 5.9477483339  | -3.2836278905 |
| H | -2.7089175842 | 6.3147343836  | -3.5388850698 |
| H | -4.0421364115 | 6.6511249217  | -2.9038812319 |

Coordinates Figure 7(e).

99

Energy -325.018870577002

|   |               |               |               |
|---|---------------|---------------|---------------|
| O | 0.8874397435  | 5.0257846925  | -3.3104845796 |
| H | 0.8918667357  | 5.5810044446  | -4.0737603376 |
| H | 1.0247548019  | 4.1433870703  | -3.6160945681 |
| O | -4.1298730105 | 3.6682373238  | 1.4123862540  |
| H | -4.1591951681 | 4.5821757030  | 1.1784304797  |
| H | -4.2455170695 | 3.6238907439  | 2.3480882827  |
| O | -2.0305234299 | -1.1841745206 | -2.8954751896 |
| H | -2.0037010072 | -2.1197677449 | -2.7737199830 |
| H | -1.9480615557 | -1.0288115113 | -3.8228051356 |
| O | -4.2859489593 | 6.3048775440  | 0.5640238633  |
| H | -4.8819976433 | 6.3927136827  | -0.1625359987 |
| H | -3.5013796652 | 6.7742947527  | 0.3295521997  |
| O | -3.2509052714 | 5.4175385838  | -5.5492953203 |
| H | -4.0866567775 | 5.3158155799  | -5.9759688543 |
| H | -3.3942777278 | 5.2575436587  | -4.6302064145 |
| O | -6.0737073406 | 2.3090400396  | -0.3614337360 |
| H | -5.5930195484 | 1.6102017317  | -0.7754901572 |
| H | -5.4838209333 | 2.7180594231  | 0.2514411489  |
| O | 0.9387006132  | 6.8208161162  | -5.6630523859 |
| H | 0.9536424153  | 6.3678901272  | -6.4910096584 |
| H | 1.7115145147  | 7.3620187618  | -5.6359078819 |
| O | -3.1327148281 | 8.7723162970  | -7.6238697072 |
| H | -2.5876600894 | 8.7371541655  | -6.8540922001 |
| H | -3.0351615224 | 9.6384661069  | -7.9860109963 |
| O | -5.7161702963 | 4.8849100685  | -6.7552176964 |
| H | -5.5742284906 | 4.2472214233  | -7.4364549309 |
| H | -6.3034916293 | 4.4891541031  | -6.1312711267 |
| O | -5.7972692770 | 8.4414059380  | -3.8194406531 |
| H | -6.3893661744 | 9.1731735231  | -3.7500438263 |
| H | -5.7840402544 | 8.1884277741  | -4.7286741191 |
| O | 0.5175019807  | 2.2669963522  | -4.1525736007 |
| H | -0.3185902207 | 2.5148336484  | -4.5136898695 |
| H | 0.3395029006  | 1.8001802259  | -3.3517755702 |
| O | -2.0468090712 | 2.5628496621  | -0.3237209607 |
| H | -2.5807185459 | 2.7872307812  | 0.4215791402  |
| H | -1.7539204246 | 3.3763143263  | -0.7023631862 |
| O | -1.7666210935 | 7.8570727530  | -5.3657441897 |
| H | -2.2417478576 | 7.0422571824  | -5.4005090876 |
| H | -0.8490600042 | 7.6374177248  | -5.3924232109 |
| O | -5.7803736206 | 6.2649166955  | -1.9215246529 |
| H | -5.9289328734 | 6.9843240515  | -2.5141979682 |
| H | -6.5506377288 | 5.7205803395  | -1.9571559476 |
| O | -0.1499197746 | 0.7859635133  | -1.8102881288 |
| H | -0.6899338731 | 0.0456022487  | -2.0364040847 |
| H | -0.5957993285 | 1.2451720968  | -1.1166042279 |
| O | -1.2925632818 | 5.0666115465  | -1.5483743443 |

|   |               |               |               |
|---|---------------|---------------|---------------|
| H | -0.5243724865 | 5.0863199168  | -2.0964372387 |
| H | -1.3363483971 | 5.9026519481  | -1.1124870139 |
| O | -5.7301072371 | 7.8064506236  | -6.5415241375 |
| H | -4.9710763730 | 8.1187765475  | -7.0075746912 |
| H | -5.8435256340 | 6.9012058378  | -6.7834881825 |
| O | -3.8359109696 | 0.7638449398  | -1.6610860996 |
| H | -3.3899284759 | -0.0084330557 | -1.9702216153 |
| H | -3.1761339435 | 1.3282276656  | -1.2908903827 |
| O | -3.6607826645 | 4.7510091680  | -2.9647733249 |
| H | -4.3186745448 | 5.2514005558  | -2.5090703658 |
| H | -2.8734559158 | 4.8027098682  | -2.4467751759 |
| O | -0.0163676336 | 2.7875411677  | -8.0517376456 |
| H | -0.5074900526 | 2.9012705498  | -7.2537759602 |
| H | 0.4930045378  | 1.9998750372  | -7.9468543208 |
| O | 0.9545082183  | 0.5284961711  | -6.3179737767 |
| H | 1.7046856648  | -0.0438728017 | -6.2954790713 |
| H | 1.0239286172  | 1.0963419272  | -5.5672338353 |
| O | -4.8433089247 | 2.7293385006  | -8.5785225345 |
| H | -4.0281084811 | 2.9572085368  | -8.9961371144 |
| H | -5.3903563665 | 2.3433830983  | -9.2438464992 |
| O | -2.1207995101 | 6.1209677879  | -8.3966989019 |
| H | -2.3308685816 | 5.8318247379  | -7.5231167730 |
| H | -2.4808984557 | 6.9885168112  | -8.4892510255 |
| O | -1.7396230743 | -0.6853012189 | -5.6388172097 |
| H | -2.4193000105 | -0.1386803147 | -5.9995432879 |
| H | -0.9191937070 | -0.3426791807 | -5.9556519399 |
| O | -1.6475949164 | 3.0605137411  | -5.8174754229 |
| H | -2.0701545733 | 3.9002883162  | -5.7332112348 |
| H | -2.3315501710 | 2.4256602290  | -5.9590546660 |
| O | -2.9849793102 | 8.8909993193  | -2.9267766548 |
| H | -2.5051305848 | 8.6730483143  | -3.7097970978 |
| H | -3.9000605433 | 8.7797692578  | -3.1295885487 |
| O | 0.7252910982  | 5.5960409677  | -8.1281962827 |
| H | 0.7516747283  | 4.6547473815  | -8.1926070172 |
| H | -0.1182374496 | 5.8667057733  | -8.4538933907 |
| O | -2.4078798764 | 3.5065426252  | -9.6715254939 |
| H | -2.3109473235 | 4.4341979481  | -9.5268253342 |
| H | -1.6188817260 | 3.0983284877  | -9.3525872700 |
| O | -7.1315081676 | 3.4903695687  | -4.7299077716 |
| H | -6.4730808009 | 2.8851249757  | -4.4281945976 |
| H | -7.5369406225 | 3.8561486720  | -3.9600320504 |
| O | -1.9962654272 | 7.7086304385  | -0.6020283895 |
| H | -1.4822012903 | 8.3468747311  | -0.1337755303 |
| H | -2.3279592814 | 8.1402954790  | -1.3730815226 |
| O | -4.7598350411 | 2.2599957954  | -3.8242647283 |
| H | -4.3361238077 | 3.0684804293  | -3.5840568152 |
| H | -4.5957042261 | 1.6491297956  | -3.1237061941 |
| O | -3.7770611460 | 1.3385305475  | -6.2578014172 |
| H | -4.2885806833 | 1.5543530666  | -5.4944883378 |
| H | -4.2664885592 | 1.6399538394  | -7.0064557168 |
| O | -7.6662963675 | 4.1245073837  | -1.8459024309 |
| H | -7.1312052034 | 3.4794744213  | -1.4117499488 |
| H | -8.5081489293 | 4.1102115510  | -1.4193366712 |
